# Supplementary material
Source: Springer Nature journal article supplement (https://www.springermedizin.de/resource/supplementary/12865_2006_110_MOESM6_ESM.pdf/9428530)

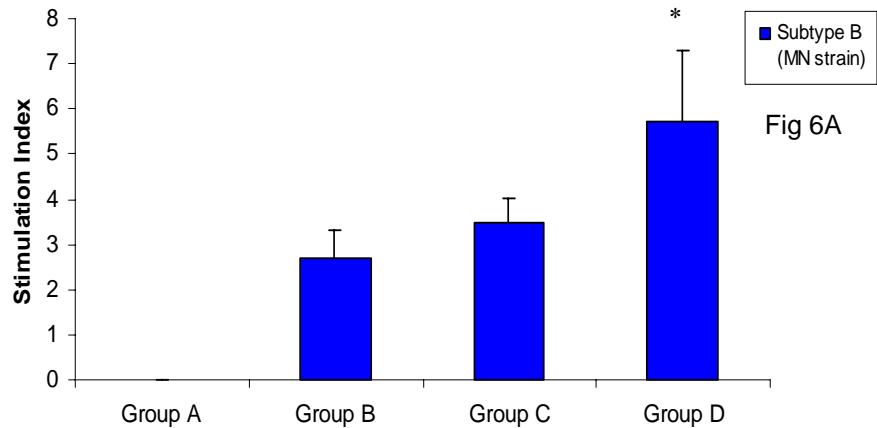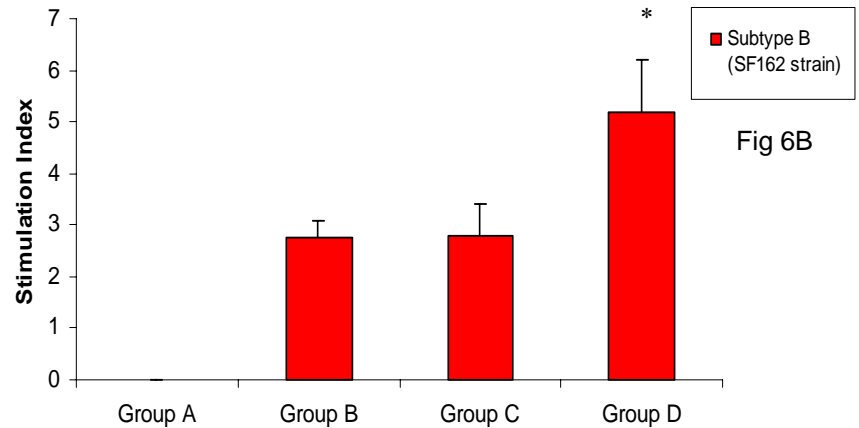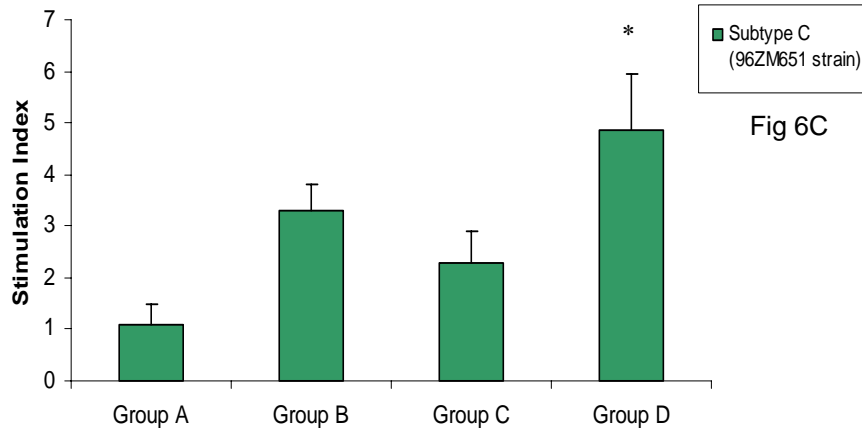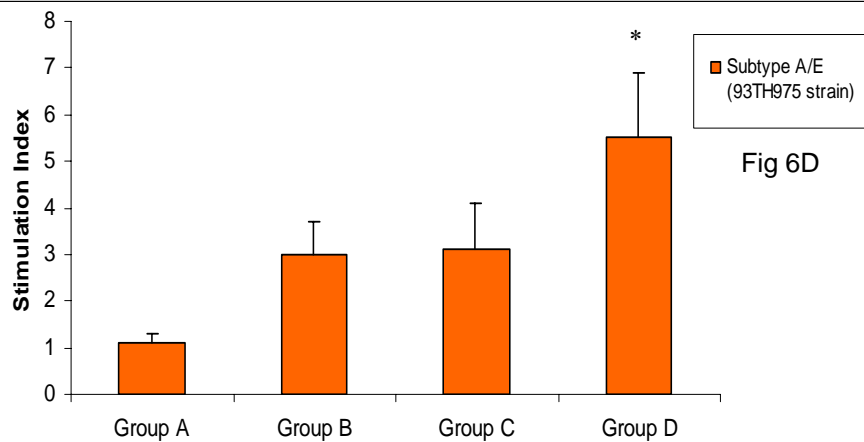

Supplement: MOESM6 [file 9428530]
